# Supplementary material for: Fluorescein-based sensors to purify human α-cells for functional and transcriptomic analyses
Source: eLife journal article supplement (doi:10.7554/elife.85056), 2023-09-19
Supplement: figures [file elife-85056-figures-v3.pdf]

---

## Figures and figure supplements

Fluorescein-based sensors to purify human  $\alpha$ -cells for functional and transcriptomic analyses

**Sevim Kahraman et al.**

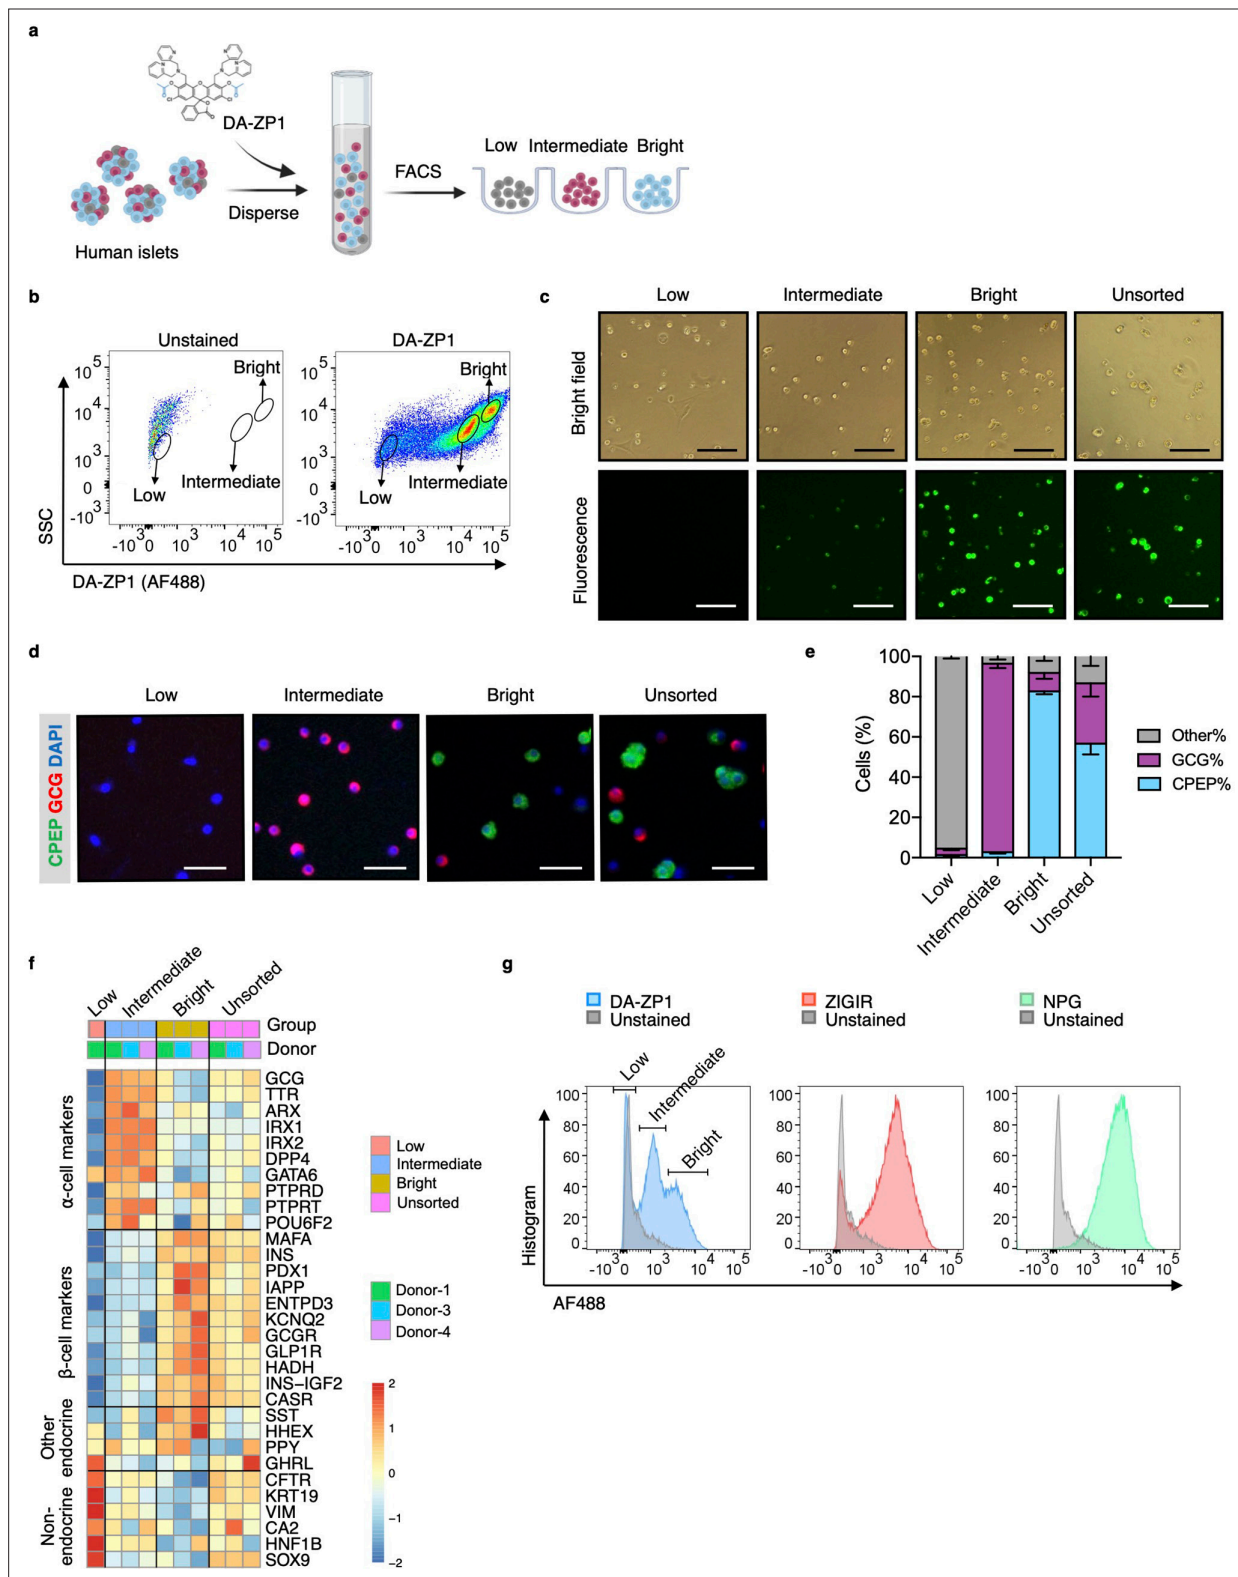

**Figure 1.** Isolation of live human pancreatic  $\alpha$ -cells after staining with diacetylated Zinpyr1 (DA-ZP1) by fluorescence activated cell sorting (FACS). (a) Experimental outline. (b) Representative FACS plot showing three cell populations with low, intermediate, or bright fluorescence. The plot represents the data collected from Donor-1 islets. Unstained (left) vs DA-ZP1-treated (right) human islets. Gating strategy and the data collected from the other donors (n=4) are given in **Figure 1—figure supplement 1**. (c) The DA-ZP1 derived green fluorescence is maintained in the next day of sorting in the sorted islet cells. The cells were plated in Matrigel-coated flat-bottom plates. Scale bar, 100  $\mu$ m. See also **Figure 1—figure supplement 1**. (d)

Figure 1 continued on next page

*Figure 1 continued*

Representative images of human islet cells after FACS showing C-peptide (green) and glucagon (red) expressing islet cells. Nuclei were stained with DAPI (blue). Scale bar, 50  $\mu$ m. **(e)** Quantification of percentage of CPEP+, GCG+, and other cells (CPEP- GCG-) in each cell population. Data are presented as mean values  $\pm$  s.e.m. n=3 donors. **(f)** Heatmap showing expression of genes in different cell subsets. n=3 donors. **(g)** Comparison of other zinc-based dyes with DA-ZP1 by FACS.

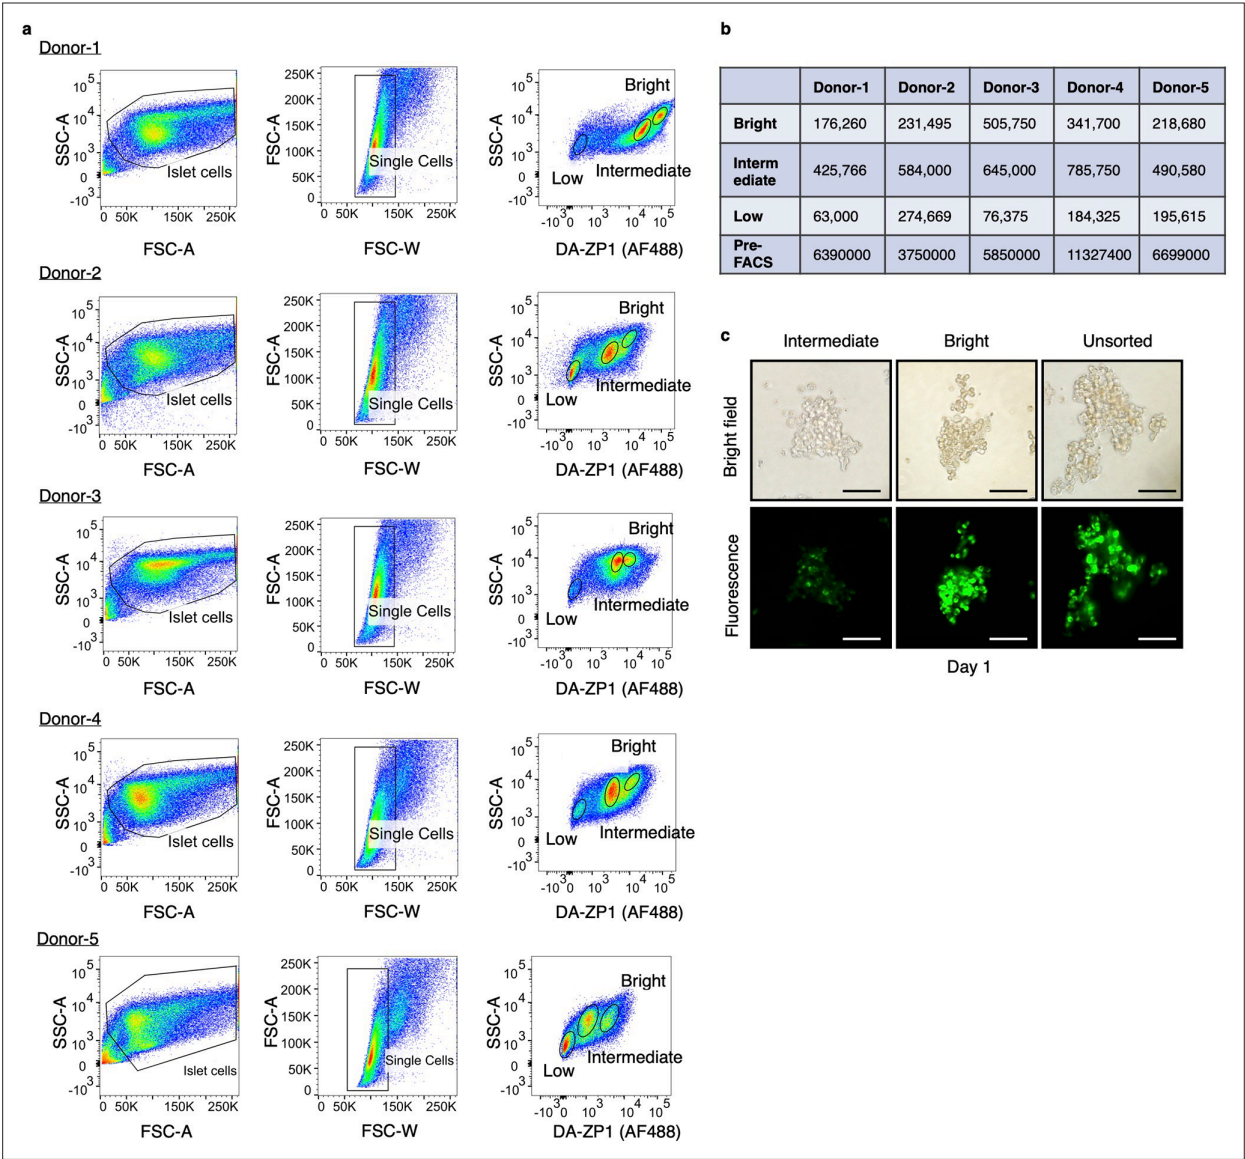

**Figure 1—figure supplement 1.** Gating strategy for isolation of live human pancreatic  $\alpha$ -cells. **(a)** Starting cell population was determined by SSC-A/FSC-A gating. Single human islet cells were gated according to FSC-A/FSC-W gating. Treatment of the single cells with diacetylated Zinpyr1 (DA-ZP1) resulted in three cell populations with different fluorescence intensity (low, intermediate, and bright).  $n=5$  human islet donors. Donor information is given in **Supplementary file 9**. **(b)** Number of live cells collected by fluorescence activated cell sorting (FACS) using 15,000 islet equivalent determined by trypan blue staining. **(c)** The DA-ZP1 derived green fluorescence is maintained in the next day of sorting in the sorted islet cells. Scale bar, 100  $\mu\text{m}$ .



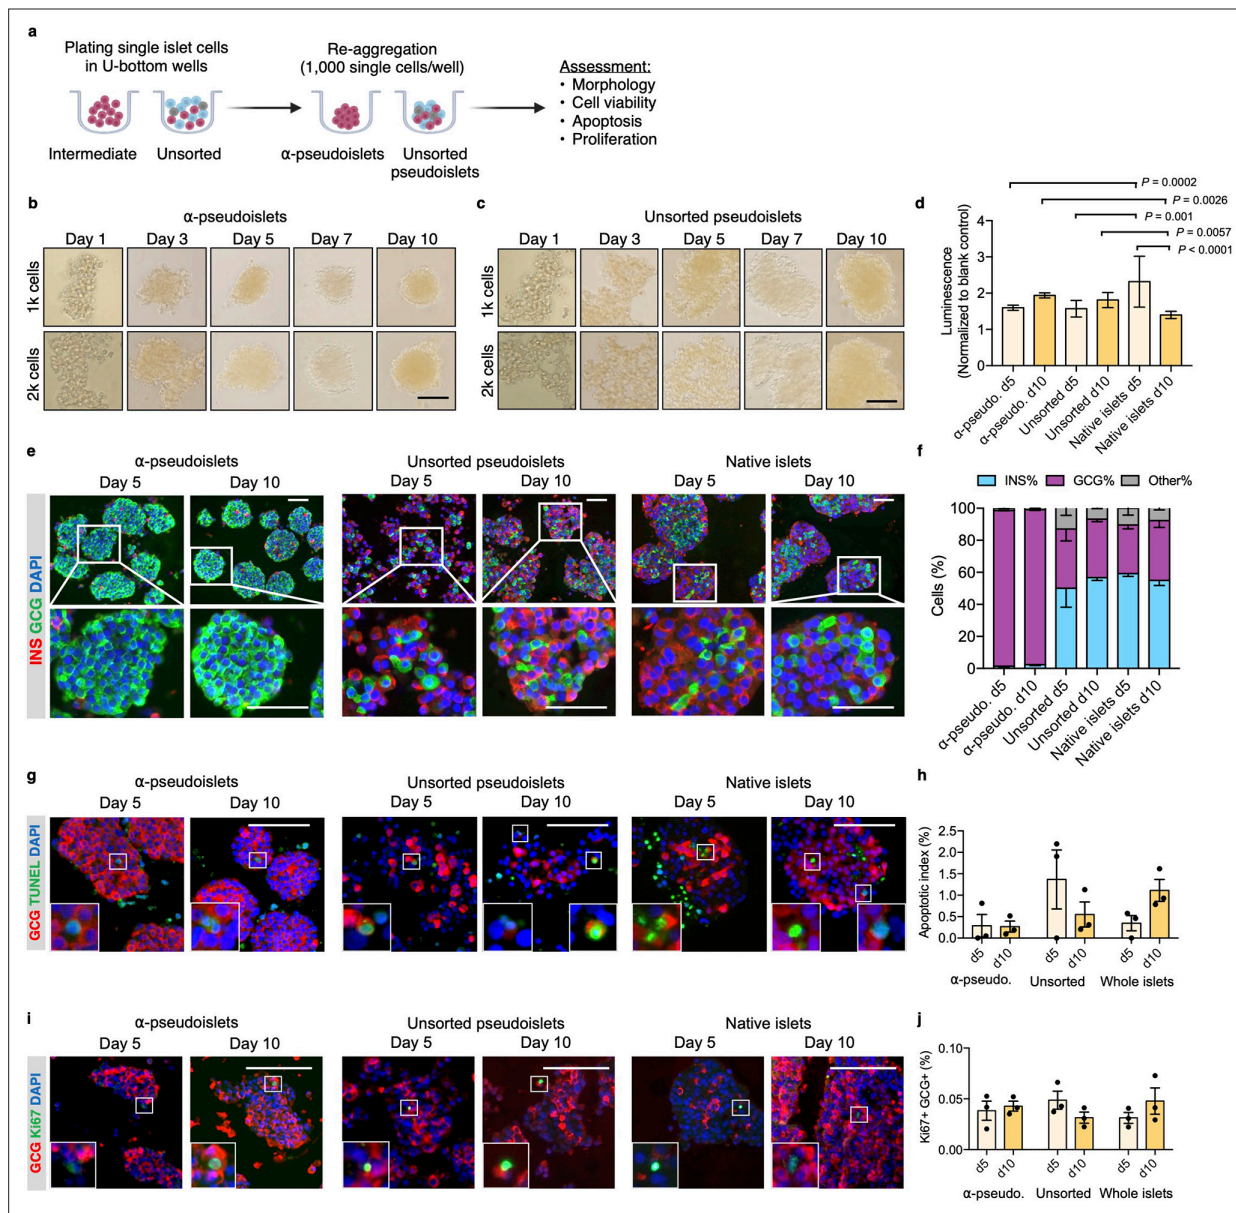

**Figure 2.** α-Pseudoislets are viable and able to proliferate in vitro post-sorting. **(a)** The single islet cells were seeded in round-bottom wells (1k cells per well) after sorting to allow re-aggregation. **(b, c)** Bright-field images of intermediate (sorted α-cells) **(b)** and unsorted pseudoislets **(c)** post-sorting. 1k (top panel) or 2k (bottom panel) single cells were seeded per well. Scale bar, 100 μm. See also **Figure 2—figure supplement 1**. **(d)** Cell viability was quantified by luminescence reflecting intracellular ATP levels on days 5 and 10 following fluorescence activated cell sorting (FACS). Fold-change relative to blank control.  $n=7-9$  replicates using islet cells from two donors. **(e)** Representative immunostaining images of α-pseudoislets, unsorted pseudoislets, and native islets on days 5 and day 10 showing INS (red), GCG (green). Nuclei stained with DAPI are blue. For top and bottom images, scale bar, 100 μm. **(f)** Percentage of INS+, GCG+, and other (INS-GCG-) islet cells.  $n=3$  donors. **(g)** Representative immunostaining images of α-pseudoislets, unsorted pseudoislets, and native islets on day 5 and day 10 showing GCG (red), TUNEL (green). Nuclei stained with DAPI are blue. Scale bar, 100 μm. Boxes show apoptotic α-cells. **(h)** Percentage of TUNEL+GCG+ cells.  $n=3$  donors. **(i)** Representative immunostaining images of α-pseudoislets, unsorted pseudoislets, and native islets on day 5 and day 10 showing GCG (red), Ki67 (green). Nuclei stained with DAPI are blue. Scale bar, 50 μm. Boxes show proliferating α-cells. **(j)** Percentage of Ki67+GCG+ cells.  $n=3$  donors. Data are presented as mean values  $\pm$  s.e.m. **(b-j)**.  $n=3$  donors. Two-way ANOVA followed by Sidak's multiple comparison test **(d, h, j)**.

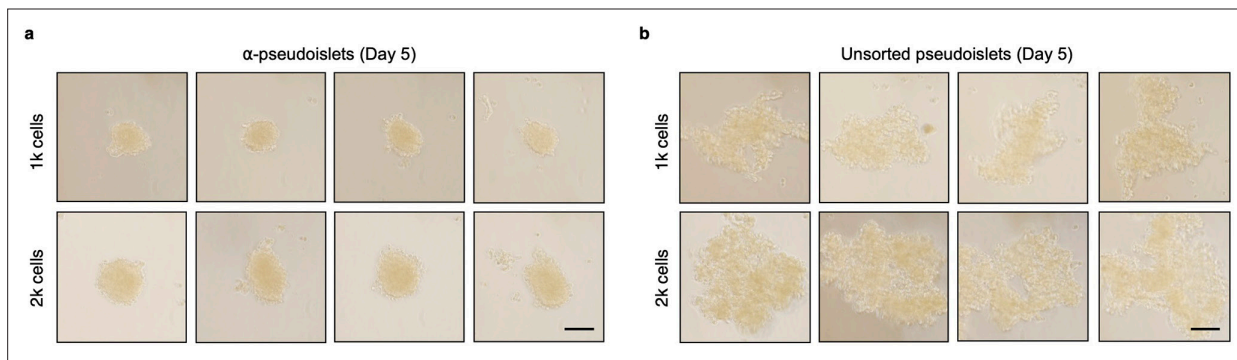

**Figure 2—figure supplement 1.**  $\alpha$ -Pseudoislets tended to form tighter clusters. Bright-field images of  $\alpha$ -pseudoislets (a) and unsorted pseudoislets (b) 5 days post-sorting. 1k (top panel) or 2k (bottom panel) single cells were seeded per well. Scale bar, 100  $\mu$ m. n=3 biological replicates using islet cells from a single donor (a, b).

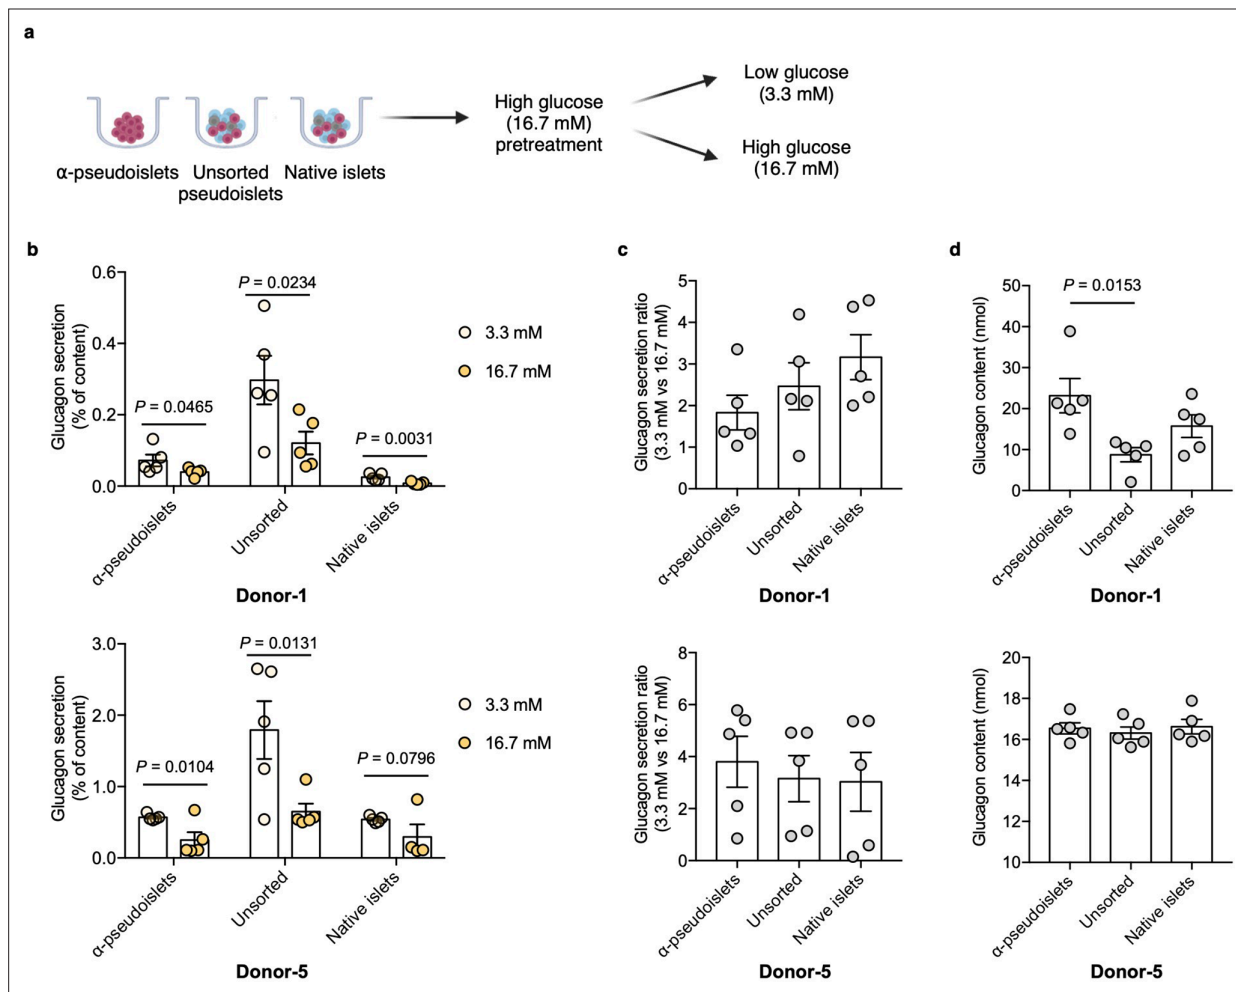

**Figure 3.** Glucagon secretion in response to glucose challenge. (a)  $\alpha$ -Pseudoislets, unsorted pseudoislets, or native islets were preincubated in Krebs-Ringer bicarbonate (KRB) buffer with 16.7 mM glucose followed by the incubation in KRB buffer with 3.3 mM glucose and 16.7 mM glucose on day 5 post-sorting. (b) Glucagon secretion in response to glucose challenge (3.3 mM vs 16.7 mM). One-tailed Student's t-test. (c) Ratio of glucagon released by each groups of cells at 16.7 mM glucose versus that at 3.3 mM glucose. (d) Glucagon content measured in each well containing ~8000 cells (eight  $\alpha$ -pseudoislets, eight unsorted pseudoislets, and eight native islets). Data are presented as mean values  $\pm$  s.e.m. (b–d).  $n=5$  replicates using islet cells from two donors (b–d). One-way ANOVA corrected for Tukey applied to (c, d).

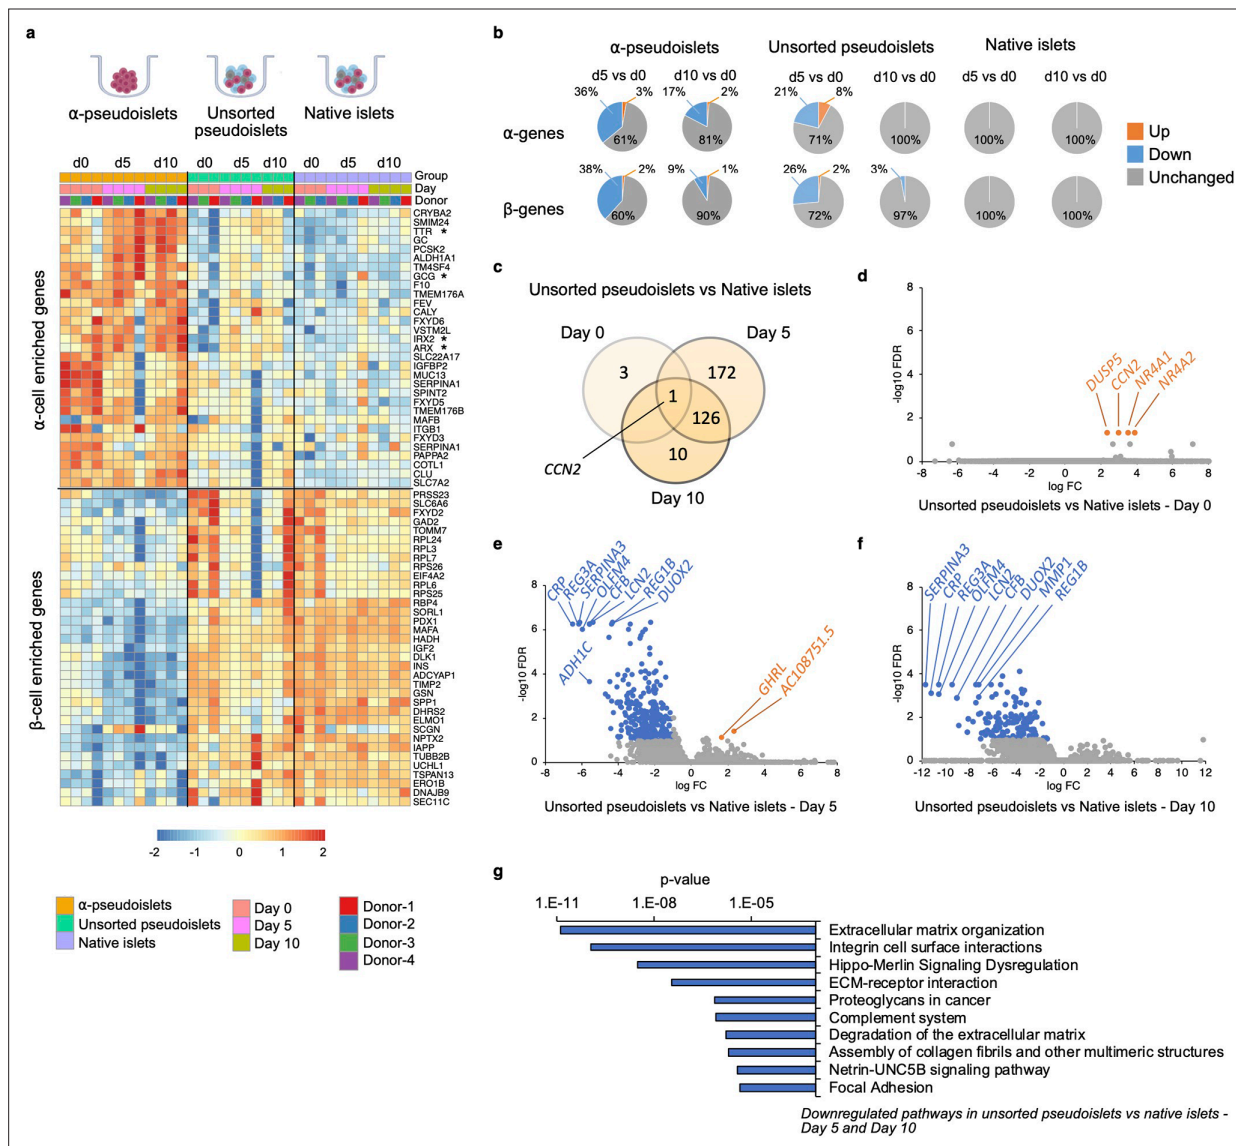

**Figure 4.** Changes in gene expression levels driven by dissociation and re-aggregation of human islet cells. **(a)** Heatmap showing expression levels of α-cell enriched and β-cell enriched genes in α-pseudoislets, unsorted pseudoislets, and native islets on days 0, 5, and 10. Asterisks show genes associated with α-cell identity and function (GCG, ARX, IRX2, TTR). **(b)** Pie charts showing percentage of α-cell enriched (top panel) and β-cell enriched (bottom panel) genes that alter in α-pseudoislets, unsorted pseudoislets, and native islets on day 5 or day 10 compared to day 0. See also **Figure 4—figure supplement 1**. **(c)** Transcriptome of unsorted pseudoislets was compared with native islets on different days. **(d–f)** Volcano plots showing genes downregulated (blue) or upregulated (orange) significantly ( $FC < -2$  or  $FC > 2$ , respectively,  $FDR < 0.1$ ) on day 0 **(d)**, day 5 **(e)**, and day 10 **(f)**. Gray shows non-significant genes with  $FDR > 0.1$  and  $-2 < FC < 2$ . **(g)** Top 10 pathways downregulated in unsorted pseudoislets on day 5 and day 10 compared to native islets.  $n=4$  donors; α-pseudoislets d0, d5, d10, unsorted pseudoislets d5, native islets d5, d10, and  $n=3$  donors; unsorted pseudoislets d0, d10, native islets d0 **(a–g)**.

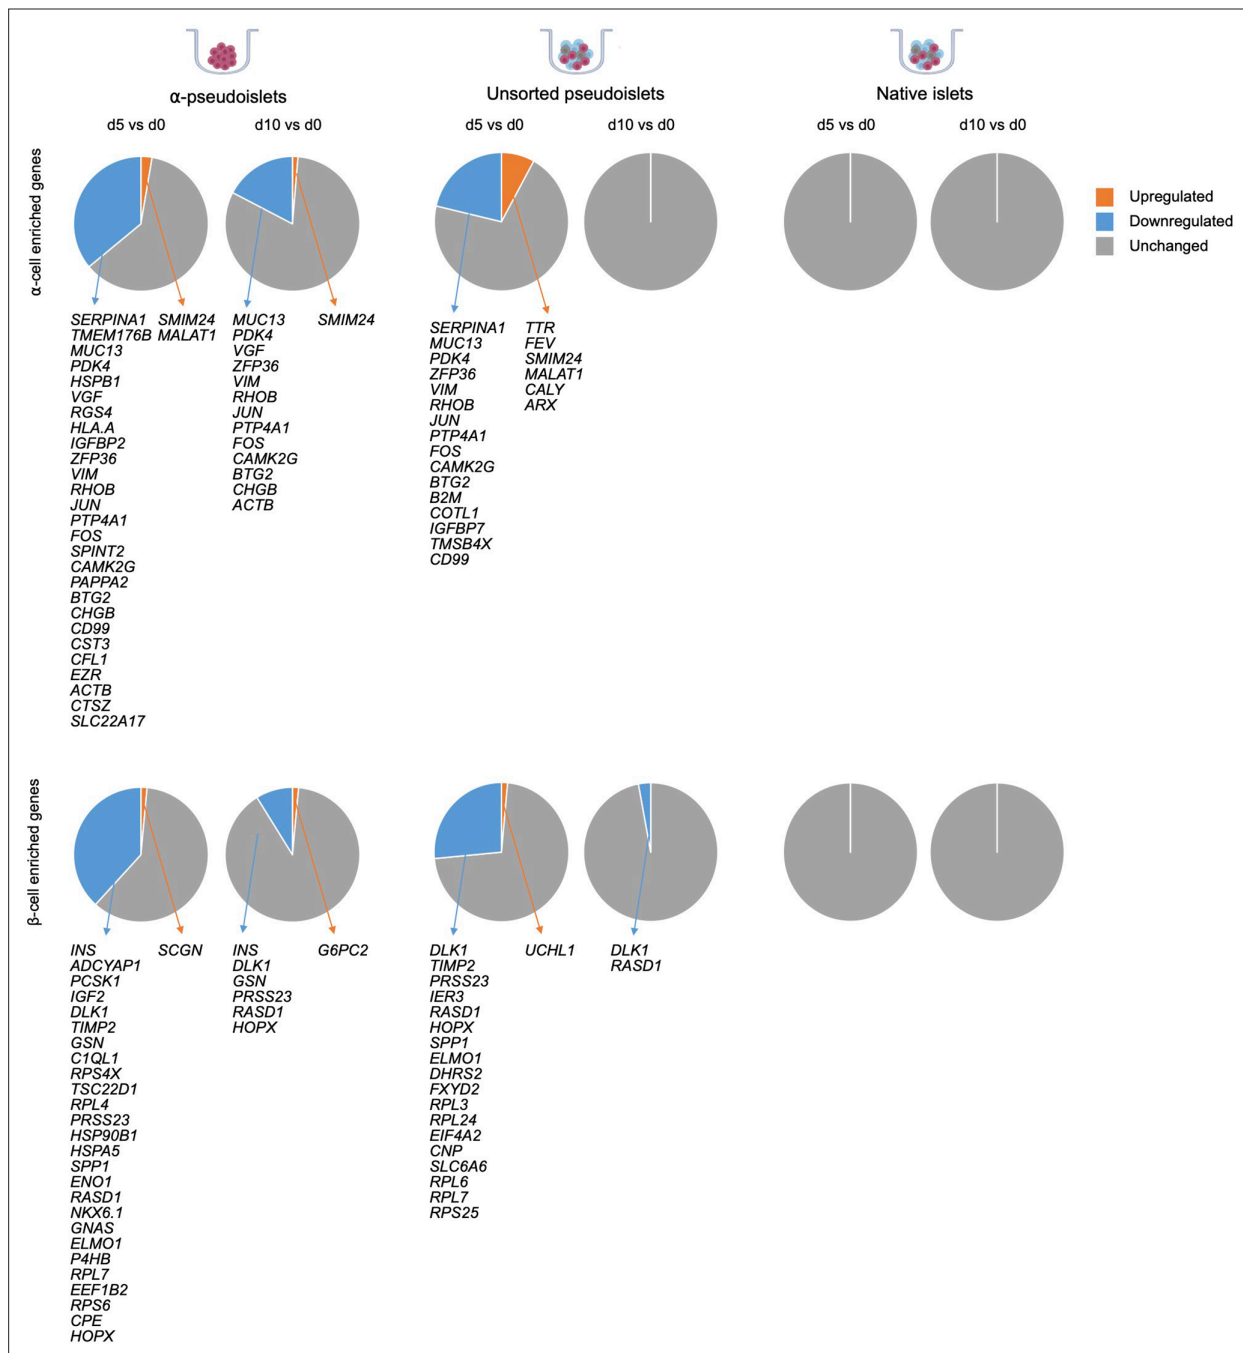

**Figure 4—figure supplement 1.** Changes in expression levels of  $\alpha$ -cell enriched and  $\beta$ -cell enriched genes in  $\alpha$ -pseudoislets, unsorted pseudoislets, and native islets on days 0, 5, 10. Pie charts show percentage of genes altered on day 5 or 10 compared to day 0 (FDR < 0.1; FC > 2 upregulated or FC < -2 downregulated). n=4;  $\alpha$ -pseudoislets d0, d5, d10, unsorted pseudoislets d5, native islets d5, d10, and n=3; unsorted pseudoislets d0, d10, native islets d0.



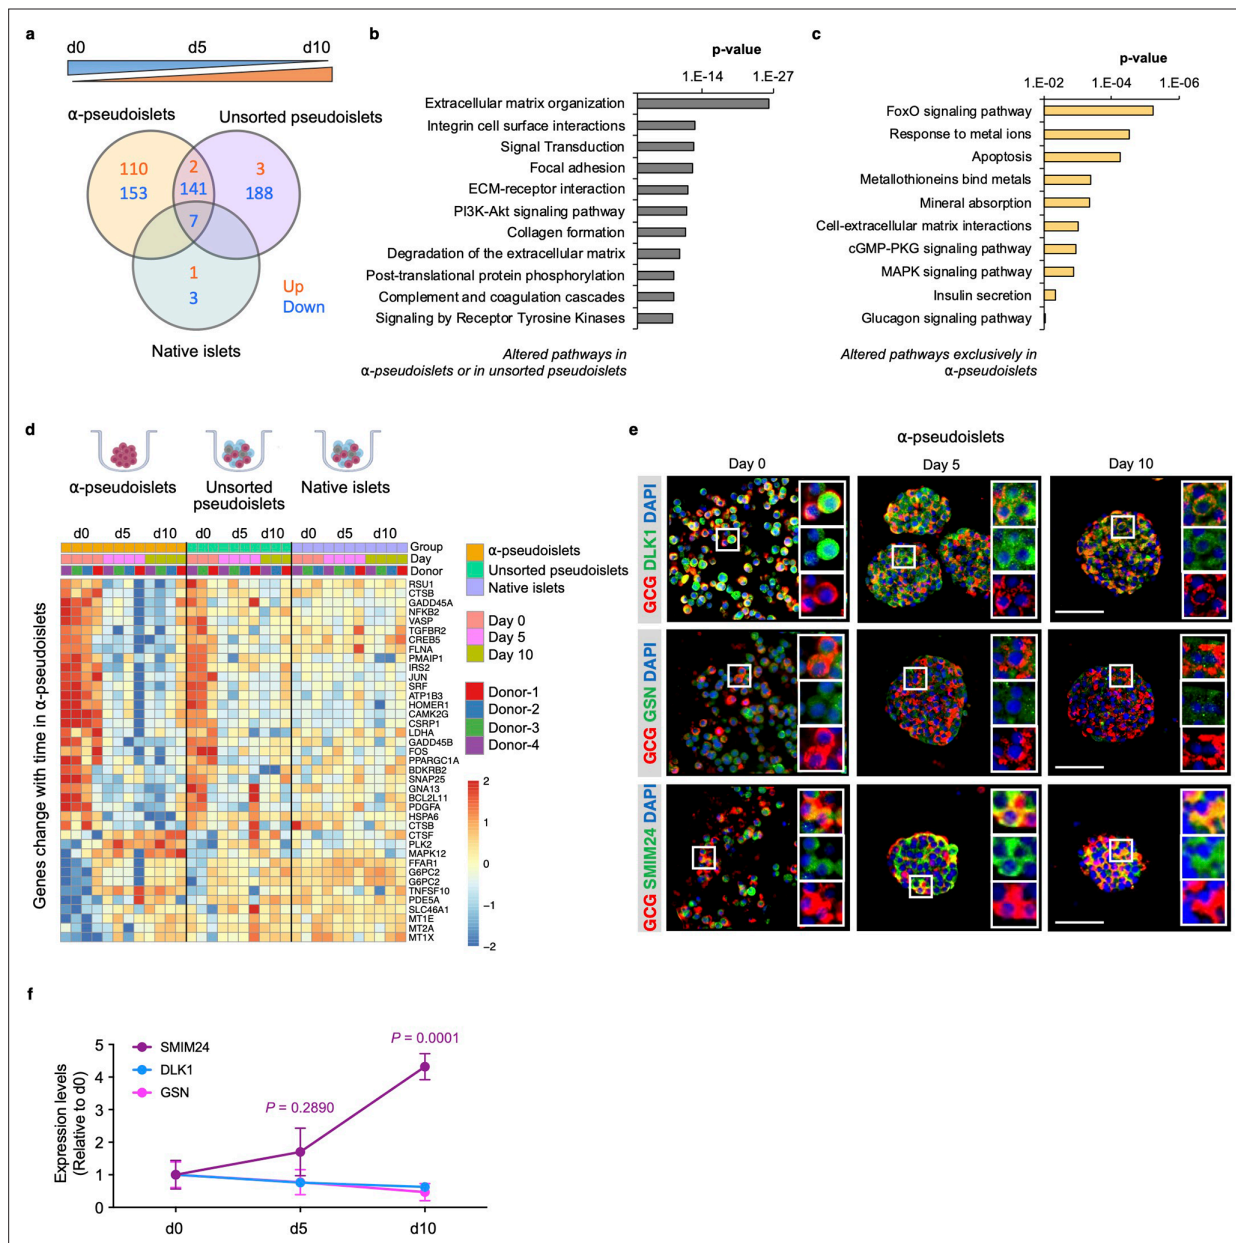

**Figure 5.** Time-dependent changes in transcriptome of  $\alpha$ -pseudoislets. **(a)** Venn diagram shows number of genes that progressively up- or downregulated in  $\alpha$ -pseudoislets, unsorted pseudoislets, and native islets in culture over the period from day 0 to day 5 to day 10. **(b, c)** Pathway analysis showing altered pathways in  $\alpha$ -pseudoislets or in unsorted pseudoislets except native islets **(b)**, and altered pathways only in  $\alpha$ -pseudoislets with time **(c)**. **(d)** Heatmap showing expression levels of genes significantly change with time only in  $\alpha$ -pseudoislets.  $n=4$  donors;  $\alpha$ -pseudoislets d0, d5, d10, unsorted pseudoislets d5, native islets d5, d10, and  $n=3$  donors; unsorted pseudoislets d0, d10, native islets d0 **(a–d)**. **(e)** Representative immunostaining images of  $\alpha$ -pseudoislets on day 0, 5, and 10 showing GCG (red), DLK1, GSN, and SMIM24 (green). Nuclei stained with DAPI are blue. Scale bar, 50  $\mu$ m. **(f)** Expression level of each protein in  $\alpha$ -pseudoislets on days 0, 5, 10. Data are presented as mean values  $\pm$  s.e.m. Two-way ANOVA followed by Dunnett's multiple comparison test compared to d0.  $n=3$  donors **(e, f)**.
